# Supplementary material for: Single and twinned plates of 2D layered BiI3 for use as nanoscale pressure sensors
Source: Royal Society of Chemistry journal article supplement (doi:10.1039/c8ce00823j), 2018-01-01
Supplement: c8ce00823j1.pdf [file c8ce00823j1.pdf]

## Supporting Information

### **Single and Twin Plates of 2D Layered BiI<sub>3</sub> for Use as Nanoscale Pressure Sensors**

Muvva D. Prasad,<sup>†</sup> L. D Varma Sangani<sup>‡</sup>, Sudip K. Batabyal<sup>†\*</sup> and M. Ghanashyam Krishna <sup>‡</sup>

<sup>†</sup>Amrita Centre for Industrial Research & Innovation (ACIRI), Amrita School of Engineering, Coimbatore, Amrita Vishwa Vidyapeetham, Tamil Nadu-6411124, India

<sup>‡</sup>Centre for Advanced Studies in Electronics Science and Technology, School of Physics, University of Hyderabad, Hyderabad – 500046, Telangana, India.

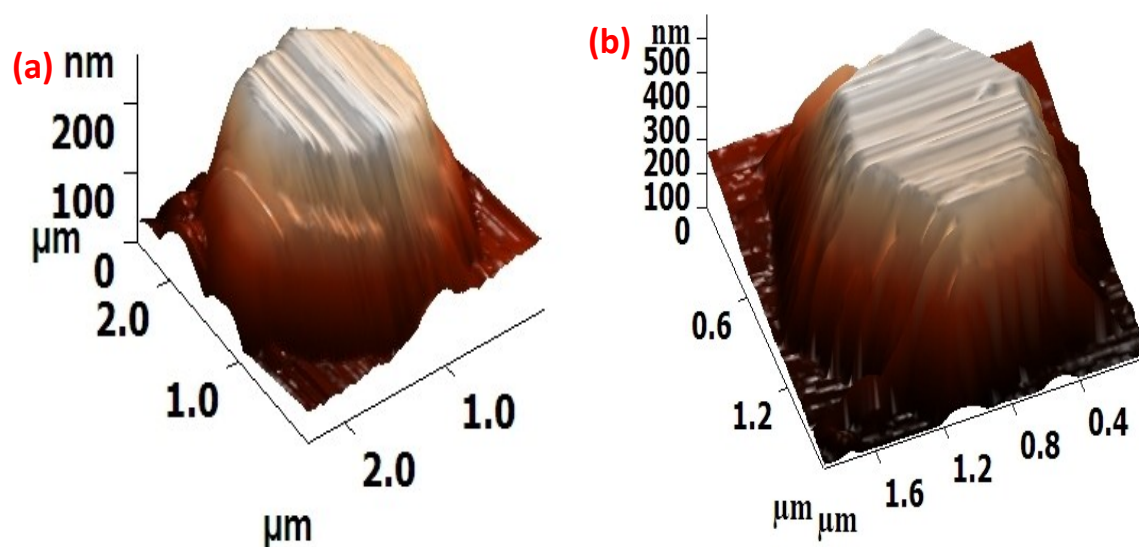

**Figure S1.** AFM Topography image of 1:5 mmol hexagonal plate (a) and (b) Twin plated morphology of 2:10 mmol concentration.

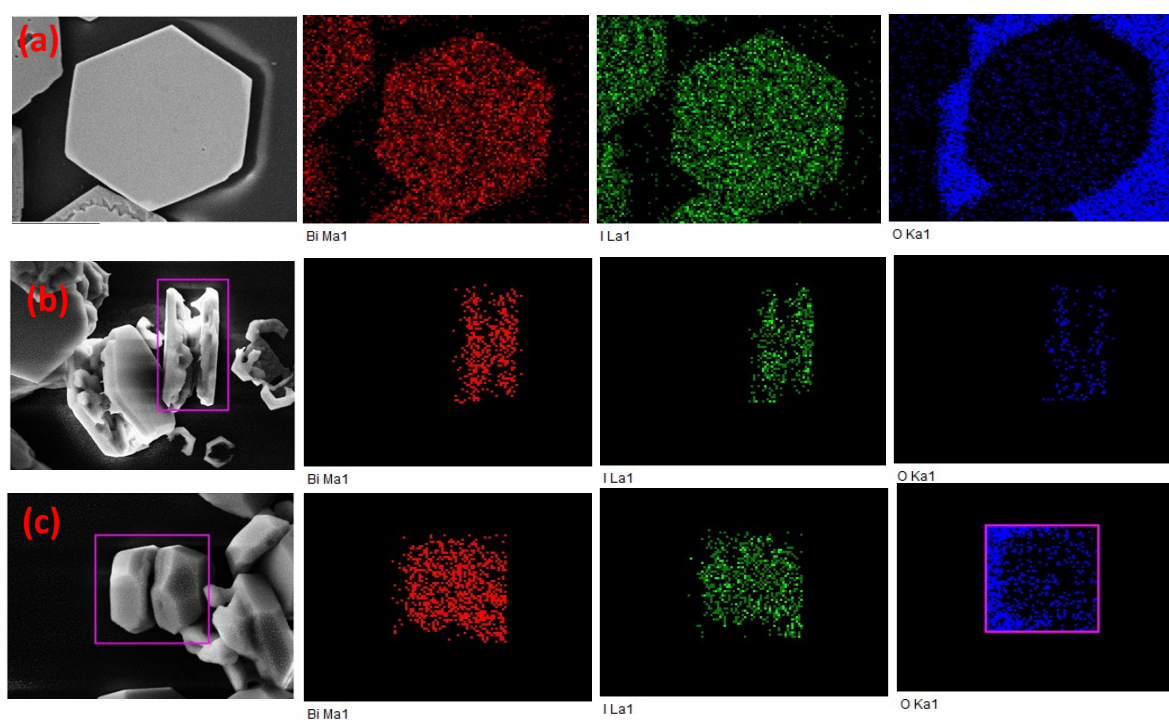

**Figure S2.** FESEM images of EDAX area mapping of  $\text{BiI}_3$  different concentration (c, mmol) of  $\text{Bi}^{3+}$  and  $\text{I}^-$ : (a) 1:5 hexagonal, (b) 2:10 Twin plates and (c) 4:20, twin plates: scale bar = 200 nm. The EDX mapping show Bi (Red), I (green) and O (blue) regions are selected.

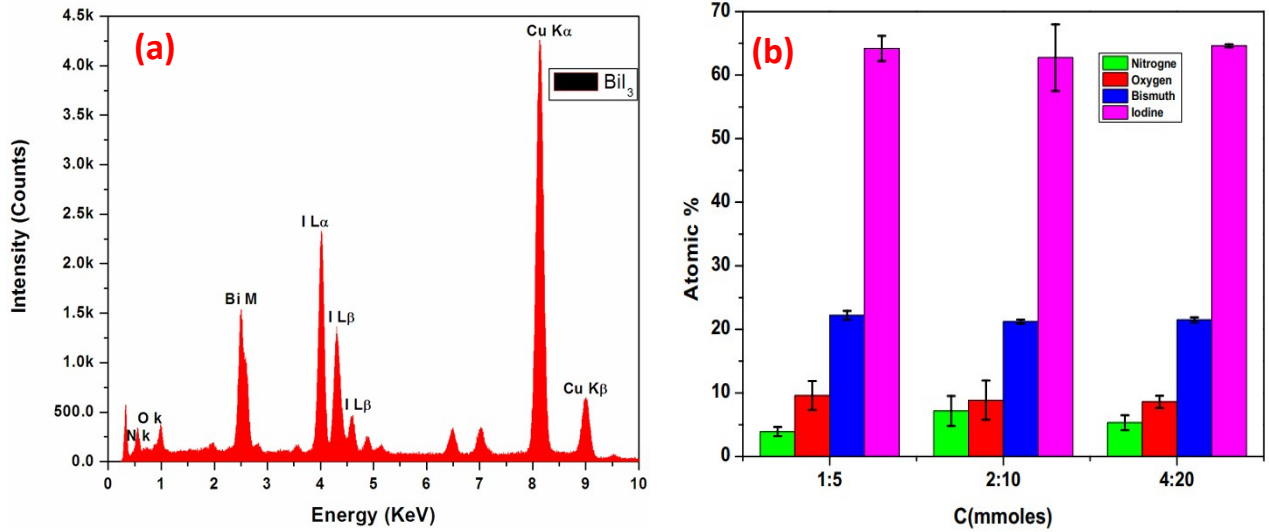

**Figure S3.** TEM images of EDAX elemental analysis of BiI<sub>3</sub> (a) and (b) Atomic percentage of three different concentrations of Bi<sup>3+</sup> and I<sup>-</sup>.

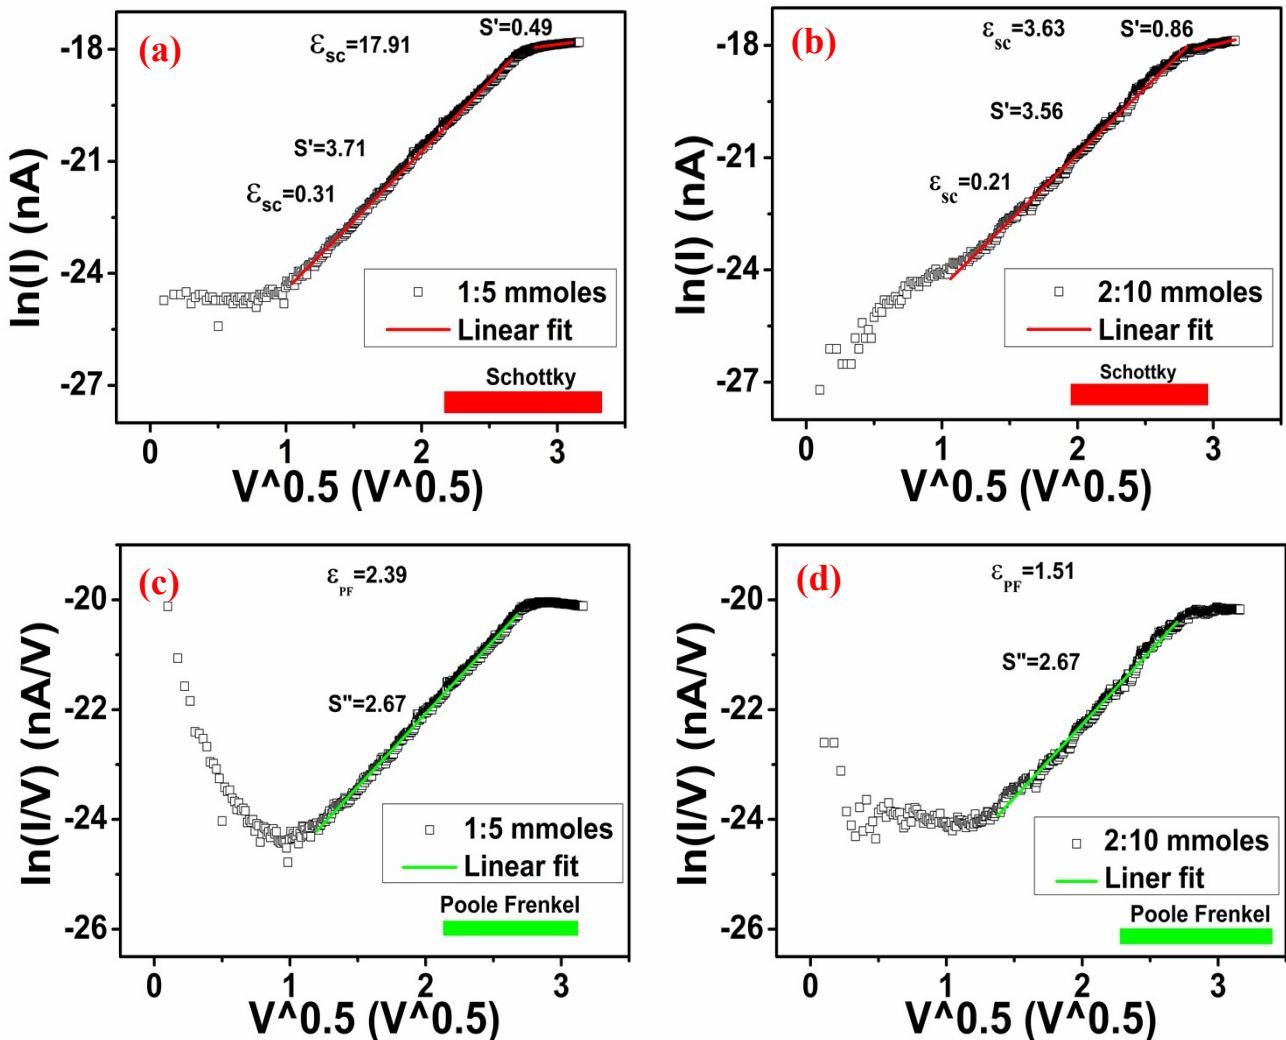

**Figure S4.** Figure 2: a) &b) Schottky model curves and c) &d) Poole frenkel curve of Single NPs and Twin NPs samples respectively.

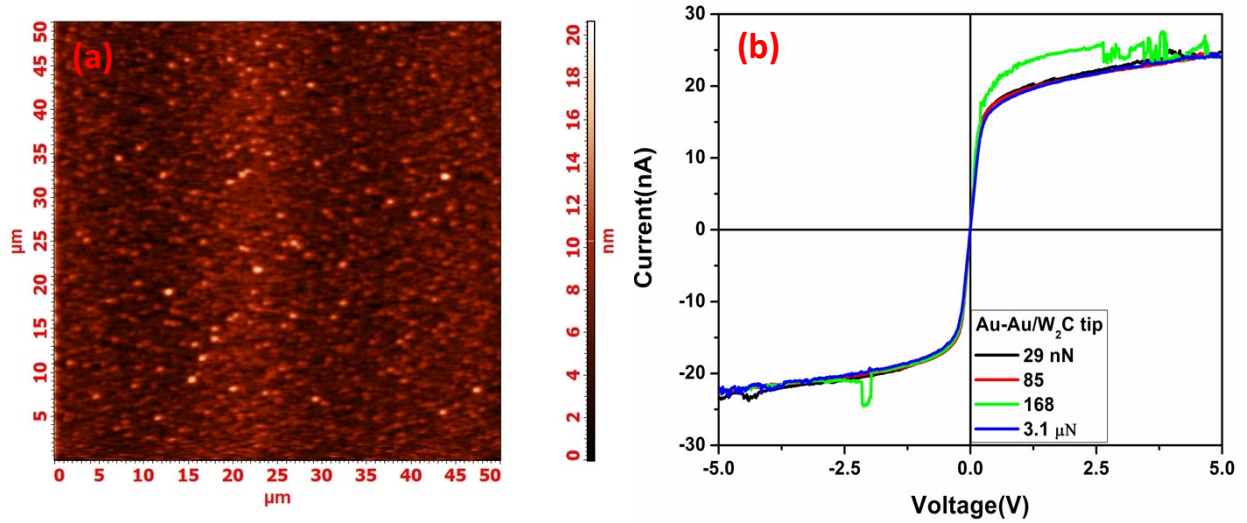

**Figure S5.** AFM images of Au substrate (a) and (b) I-V characteristics of Au substrate and AFM tip at different pressures.

### Estimation of the Active Area

To estimate the active area between AFM probe and sample, we used Derjaguin-muller – Toporov (DMT) continuum mechanical model. The active contact area,  $A$ , is given by

$$A = \sqrt[3]{\frac{R}{K}(L + 2\sqrt[3]{\epsilon R^3})^2}$$

Where  $K$  is the reduced Young's Modulus

$$\frac{1}{K} = \frac{3}{4} \left( \frac{1 - \nu_s^2}{E_s} + \frac{1 - \nu_t^2}{E_t} \right)$$

$E_t$  and  $E_s$  are young's moduli and  $\nu_t$  and  $\nu_s$  are the Poission ratios of the tip and sample, respectively. ( $E_{tin}$ )  $R$  is the tip radius ( $\sim 35$  nm) and  $L$  is applied load ( $\sim 0$  nN).  $2\pi R \gamma$  is adhesion force ( $37 \pm 1.2$  nN) between tip and sample related to the work of adhesion  $\gamma$

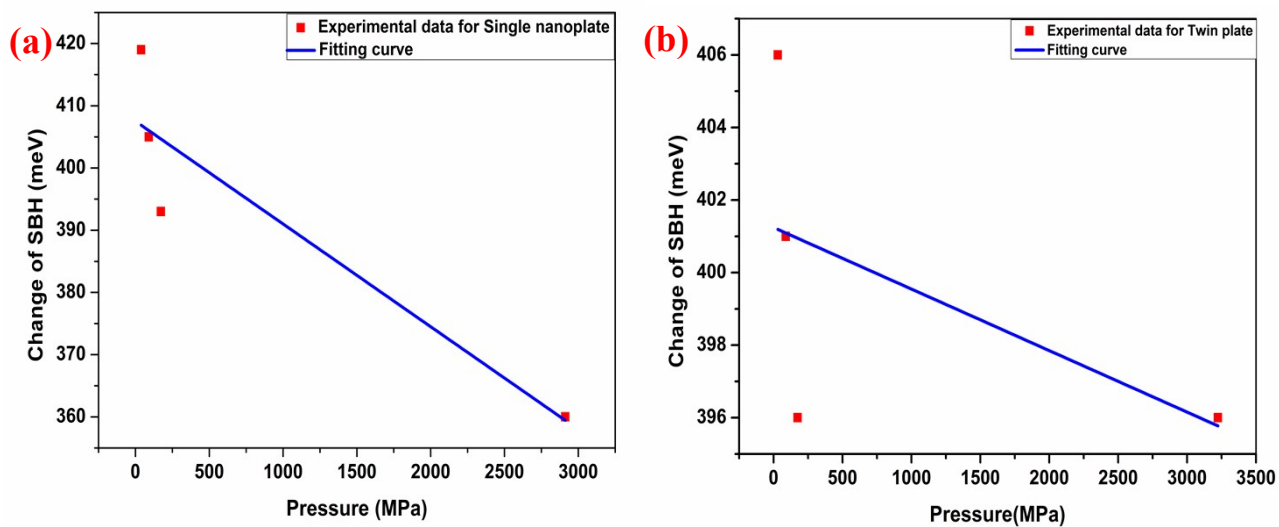

**Figure S6.** Calculated SBH changes as a function of applied pressure, (a) single plate and (b) twin platelets respectively

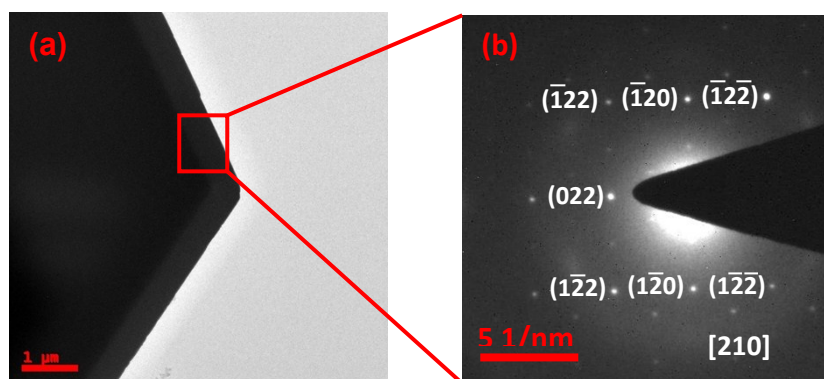

**Figure S7.** TEM bright field side facets image (a) and the corresponding SAED patterns of  $\text{BiI}_3$  crystal are indexed with their  $[210]$  zone axis
